# Supplementary material for: MiR-218 targets MeCP2 and inhibits heroin seeking behavior
Source: PubMed Central journal article supplement (PMC5225456; doi:10.1038/srep40413), 2017-01-11
Supplement: srep40413-s1.pdf [file srep40413-s1.pdf]

## **MiR-218 targets MeCP2 and inhibits heroin seeking behavior**

**Biao Yan<sup>1,2</sup>, Zhaoyang Hu<sup>1,2</sup>, Wenqing Yao<sup>1,2</sup>, Qiumin Le<sup>1,\*</sup>, Bo Xu<sup>1</sup>, Xing Liu<sup>1</sup>, and Lan Ma<sup>1,\*</sup>**

<sup>1</sup>The State Key Laboratory of Medical Neurobiology, Institutes of Brain Science and The Collaborative Innovation Center for Brain Science, Fudan University, 138 Yixueyuan Road, Shanghai 200032, China.

<sup>2</sup>These authors contributed equally to this work.

\*Correspondence to: lanma@fudan.edu.cn or qle09@fudan.edu.cn

**Fig. S1**

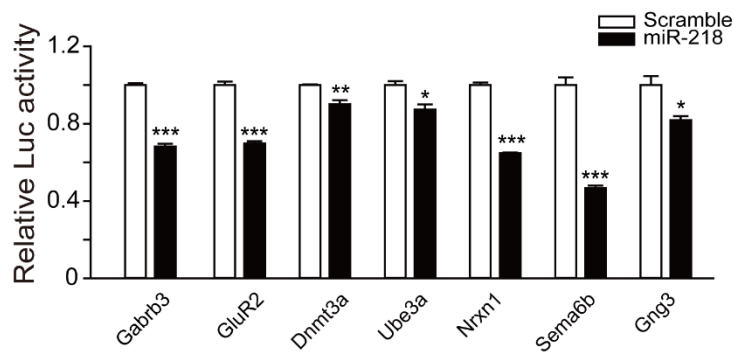

**Supplementary Figure 1:** Luciferase validation of potential miR-218 targets in addiction-related pathway. Relative luciferase activity with the Gabrb3, GluR2, Dnmt3a, Ube3a, Nrxn1, Sema6b, Gng3 3' UTR in 293T cells co-transfected with scramble or miR-218 mimic synthetic RNA (n = 3 for each group, \*P < 0.05, \*\*P < 0.01, \*\*\*P < 0.001 vs scramble).

**Supplementary Table 1.** Putative addiction-related miRNA families identified by NP method.

| <b>Symbol</b>            | <b>Z score</b> | <b>Targets</b> | <b>maxNPES</b> | <b>Leading edge targets</b>                                                                                                                                                                                                                                |
|--------------------------|----------------|----------------|----------------|------------------------------------------------------------------------------------------------------------------------------------------------------------------------------------------------------------------------------------------------------------|
| <b>miR-128-3p</b>        | 1.5027         | 764            | 0.312          | <i>Mapk1, Stat1, E2F3, Grm5, Gria1, Gabbr2, Sp1, Cacna1A, Cnr1, Gad1, Creb1, Fosb, Pparg, Ppp1Cc, Slc6A1, Grin2D, E2F6, Nfat5, Lrrfip1, Nptx1, Kcna1, Syt1, Ncam1, Nova1, Rap1B, Gabrb1, Rps6Ka5, Grb2, Nf1, Mapk14, Atp2B1, Thrb</i>                      |
| <b>miR-181-5p</b>        | 0.0993         | 758            | 0.3046         | <i>Mapk1, Fos, Gria2, Yy1, Grm5, Sp1, Drd1, Gnaq, Cnr1, Creb1, Map2K1, Bcl2, Homer1, Nfat5, Lrrfip1, Tnf, Ppp1Cb, Nr3C1, Mef2A, Ywhag, Hspa5, Atxn3, Cntn4, Nova1, Rap1B, Gabrb1, Mapt, Gnao1, Grid1, Atp2B1, Gabra1, Gabra4, Dusp6, Thrb, Dusp5, Zeb1</i> |
| <b>miR-9-5p</b>          | 0.2388         | 959            | 0.2716         | <i>Drd2, Irf1, Abat, Srf, Gabbr2, Gabrb2, Gad1, Prkca, Cnp, Nptx1, Scn2B, Kcna1, Gchl, Atxn3, Syt1, Cntn4, Rap1B, Nfkb1, Atf1</i>                                                                                                                          |
| <b>miR-27-3p</b>         | 0.4497         | 860            | 0.2603         | <i>Stat1, Grm5, Camk2A, Slc1A2, Sp1, Cacna1A, Creb1, Fosb, Pparg, Ppp1Cc, Slc6A1, Grin2D, Camk4, E2F6, Nfat5, Syt1, Ncam1, Nova1, Gabrb1, Rps6Ka5, Mapt, Grb2, Nf1, Mapk14, Atp2B1, Thrb, Dusp5, Tbp</i>                                                   |
| <b>miR-129-5p</b>        | 0.6052         | 326            | 0.2459         | <i>Mapk1, Stat1, Grm5, Gabbr2, Cacna1A, Gnaq, Glul, Kdm2B, Camk4, Mef2A, Nptx1, Syt1, Rps6Ka5, Ybx1, Sp3</i>                                                                                                                                               |
| <b>miR-218-5p</b>        | 0.7449         | 677            | 0.2393         | <i>Gria2, Yy1, Tac1, Sp1, Gabrb2, Creb1, Ppp1Cc, Slc6A1, Lrrfip1, Ppp1Cb, Kcnd2, Scn2B, Kcna1, Syt1, Gnai2, Plcg1, Gnao1, Thrb, Dusp5</i>                                                                                                                  |
| <b>miR-135-5p</b>        | 0.0898         | 528            | 0.2281         | <i>Sp1, Gabrb2, Slc6A4, Plcb1, Ppp1Cc, Nfat5, Lrrfip1, Elk3, Adcyap1, Mef2A, Nptx1, Ywhag, Scn2B, Syt1, Gabrb1, Plcg1, Rps6Ka5, Mapk10, Sp3, Nefm, Cacna1D, Thrb, Dusp5, Dusp8, Mef2C, Tfap2A</i>                                                          |
| <b>miR-148-3p/152-3p</b> | 0.8809         | 450            | 0.2244         | <i>E2F3, Grin2A, Camk2A, Cnr1, Fosb, Kdm2B, Homer1, Nfat5, Ppp1Cb, Nptx1, Atxn3, Syt1, Ncam1, Cntn4, Nova1, Rps6Ka5, Gadd45A, Erbb3, Dusp8</i>                                                                                                             |
| <b>miR-34-5p/449-5p</b>  | 0.7546         | 425            | 0.217          | <i>Mycn, E2F3, Yy1, Htr2C, Gnaq, Map2K1, Bcl2, Crhr1, Slc6A1, Prkacb, Camk4, Scn2B, Syt1, Gnai2, Casp2, Gabrb1, Plcg1, Mapt, Gnao1, Grid1</i>                                                                                                              |

|                          |        |     |        |                                                                                                                                                                |
|--------------------------|--------|-----|--------|----------------------------------------------------------------------------------------------------------------------------------------------------------------|
| <b>miR-144-3p</b>        | 0.5218 | 588 | 0.2166 | <i>Mycn, Fos, Grm5, Gabrb2, Creb1, Fosb, Tall, Egfr, Nr3C1, Mef2A, Nptx1, Adrb1, Kcna1, Noval, Rap1B</i>                                                       |
| <b>miR-23-3p</b>         | 0.0427 | 702 | 0.2117 | <i>Irf1, Stat1, Grm5, Htr2A, Htr2C, Fosb, Crebbp, Pgr, Ppp3Ca, Lpar1, Ppp1Cb, Adcyap1, Mef2A, Ywhag, Atxn3, Rap1B, Ptk2B, Dusp5, Zeb1, Pten, Mef2C, Stat5B</i> |
| <b>miR-153-3p</b>        | 2.0622 | 563 | 0.2115 | <i>E2F3, Htr1F, Plcb1, Bcl2, Crebbp, Kdm2B, Syn1, Ppp3Ca, Mef2A, Kcna1, Syt1, Noval, Igf1R, Rps6Ka5, Ryr3, Sp3, Grb2, Nf1, Snca, Pten, Mef2C, Fyn, Myb</i>     |
| <b>miR-204-5p/211-5p</b> | 1.1274 | 338 | 0.2052 | <i>Mapk1, Gabbr2, Gnaq, Creb1, Bcl2, Nfat5, Nr3C1</i>                                                                                                          |
| <b>miR-145-5p</b>        | 0.1917 | 472 | 0.1894 | <i>Mycn, E2F3, Slc1A2, Htr2A, Sp1, Dlg4, Pmp22, Ppp3Ca, Adcyap1, Plce1, Ywhag, Cntn4, Igf1R, Sp3, Cacna1D, Dusp6, Gdnf</i>                                     |
| <b>miR-139-5p</b>        | 0.2443 | 244 | 0.1872 | <i>Fos, Grin2A, Gabbr2, Jun, Homer1, Pmp22, Nfat5, Nptx1, Ywhag, Ppp2Ca, Rap1B, Igf1R,</i>                                                                     |
| <b>miR-142-5p</b>        | 0.1518 | 539 | 0.1821 | <i>Mycn, Fos, Yy1, Srf, Camk2A, Htr2A, Drd1, Nfat5, Ppp3Ca, Arhgap35</i>                                                                                       |
| <b>miR-22-3p</b>         | 0.7664 | 319 | 0.1813 | <i>Grm5, Gabbr2, Sp1, Creb1, Slc6A1, Homer1, Nr3C1, Faslg, Mapk14, Erbb3</i>                                                                                   |
| <b>miR-24-3p</b>         | 0.6480 | 345 | 0.1807 | <i>Gabbr2, Sp1, Gad1, Hap1, Prkca, Nfat5, Nptx1, Rap1B, Nefm, Mapk14, Erbb3, IL1R1, Dusp8, Per1</i>                                                            |
| <b>miR-143-3p</b>        | 2.0258 | 225 | 0.1707 | <i>Htr2A, Htr2C, Cacna1A, Bcl2, Noval, Igf1R, Erbb3</i>                                                                                                        |
| <b>miR-7-5p</b>          | 0.8035 | 308 | 0.1673 | <i>Grin2A, Sp1, Plcb1, Raf1, Gabbr1, Scn2B, Vdac1, Snca, Gabra1, Vdac3</i>                                                                                     |
| <b>miR-132-3p/212-3p</b> | 0.7259 | 255 | 0.1631 | <i>Mapk1, Slc6A1, Nfat5, Adcyap1, Mef2A, Ywhag, Noval, Mapt, Wt1</i>                                                                                           |
| <b>miR-138-5p</b>        | 0.1298 | 393 | 0.1604 | <i>Creb1, Rela, Casp3, Ywhah, Arhgap35, Nptx1, Per2, Scn1B, Gnai2, Noval, Gabrb1, Grid1, Thrb, Mapk6</i>                                                       |
| <b>miR-10-5p</b>         | 0.5119 | 203 | 0.1486 | <i>E2f3, Bdnf, Gabrb2, Creb1, Nfat5</i>                                                                                                                        |
| <b>miR-338-3p</b>        | 0.8484 | 221 | 0.1452 | <i>Stat1, Camk2A, Gnaq, Kcnd2, Noval, Mapt, Ppm1B</i>                                                                                                          |
| <b>miR-193-3p</b>        | 9.1819 | 133 | 0.1442 | <i>Mycn</i>                                                                                                                                                    |
| <b>miR-155-5p</b>        | 0.9142 | 252 | 0.1442 | <i>Fos, Bdnf, Rela, Nfat5, Mef2A</i>                                                                                                                           |
| <b>miR-221-3p/222-3p</b> | 0.9929 | 260 | 0.1396 | <i>Fos, Nfat5</i>                                                                                                                                              |
| <b>miR-194-5p</b>        | 0.4426 | 244 | 0.1363 | <i>Stat1, E2F3</i>                                                                                                                                             |
| <b>miR-365-3p</b>        | 1.3728 | 178 | 0.1245 | <i>Bdnf, Ywhah, Nr3C1, Cntn4</i>                                                                                                                               |
| <b>miR-140-5p</b>        | 0.0067 | 212 | 0.1228 | <i>Bcl2L1, Ppp1Cc, Nfat5, Ywhag, Rap1B, Igf1R</i>                                                                                                              |

|                         |         |     |        |                                                         |
|-------------------------|---------|-----|--------|---------------------------------------------------------|
| <b>miR-31-5p</b>        | 0.6497  | 210 | 0.1144 | <i>Slc1A2, Homer1, Ppp3Ca</i>                           |
| <b>miR-210-3p</b>       | 0.8070  | 19  | 0.1047 | <i>Bdnf, Mef2A</i>                                      |
| <b>miR-150-5p</b>       | 0.0408  | 142 | 0.1003 | <i>Sp1, Prkca, Ppp2Cb, Nefm, Gabrg2, Zeb1, Myb</i>      |
| <b>miR-146-5p</b>       | 0.5895  | 120 | 0.0984 | <i>Kdm2B, Syt1, Noval, Grid1, Gdnf, Per1, Rel</i>       |
| <b>miR-208-3p</b>       | 0.6935  | 133 | 0.0942 | <i>Ppp3Cb, Scn2B, Noval, Ybx1, Sp3, Gabral, Mapk6</i>   |
| <b>miR-18-5p</b>        | 0.0425  | 166 | 0.0941 | <i>Prkacb, Nfat5, Nr3C1, Kcna1, Igf1, Rasa2,</i>        |
| <b>miR-223-3p</b>       | 0.9148  | 178 | 0.0918 | <i>Mpz, E2F1, Rbpj, Igf1R, Sp3, Atp2B1, Zeb1, Mef2C</i> |
| <b>miR-490-3p</b>       | 0.4216  | 96  | 0.0509 | <i>Slc1A3</i>                                           |
| <b>miR-99-5p/100-5p</b> | -3.8616 | 38  | 0.048  | <i>Ppp1Cb, Igf1R</i>                                    |
